# Supplementary material for: An immune-related signature for optimizing prognosis prediction and treatment decision of hepatocellular carcinoma
Source: Springer Nature journal article supplement (doi:10.1186/s40001-023-01091-w), 2023-03-15
Supplement: MOESM1 [file 24627664]

**Table S1. Detailed information of included clinical cohorts with RNA-seq profiles**

| Cohorts          | RNA-seq/<br>Proteomic data | Survival<br>data | Country | Year | Platform                   |
|------------------|----------------------------|------------------|---------|------|----------------------------|
| TCGA-<br>LIHC    | YES/NA                     | Yes              | USA     | 2017 | Illumina HiSeq<br>RNAseqV2 |
| ICGC-<br>LIRI-JP | YES/NA                     | Yes              | Japan   | 2016 | Illumina HiSeq             |
| CHCC             | YES/Yes                    | Yes              | China   | 2019 | Illumina HiSeq X Ten       |

**NA, not available**

**Table S2. The clinical characteristic information of the HCC patients in TCGA cohort**

| TCGA cohort<br>(n = 363)   |               |          |
|----------------------------|---------------|----------|
| <b>Variable</b>            | <b>Number</b> | <b>%</b> |
| <b>Age</b>                 |               |          |
| < = 55                     | 122           | 33.6     |
| > 55                       | 241           | 66.4     |
| <b>Gender</b>              |               |          |
| Female                     | 118           | 32.5     |
| Male                       | 245           | 67.5     |
| <b>Histologic grade</b>    |               |          |
| G1                         | 55            | 15.2     |
| G2                         | 175           | 48.2     |
| G3                         | 116           | 32       |
| G4                         | 12            | 3.3      |
| <b>Vascular invasion</b>   |               |          |
| None                       | 205           | 66.3     |
| Micro                      | 90            | 29.1     |
| Macro                      | 14            | 4.5      |
| <b>Virus infection</b>     |               |          |
| No                         | 194           | 53.4     |
| Yes                        | 151           | 41.6     |
| <b>Alcohol consumption</b> |               |          |
| No                         | 229           | 63.1     |
| Yes                        | 116           | 32       |
| <b>TNM stage</b>           |               |          |
| I                          | 170           | 46.8     |
| II                         | 84            | 23.1     |
| III                        | 81            | 22.3     |
| IV                         | 4             | 1.1      |

**Table S3. The clinical characteristic information of the HCC patients in ICGC cohort**

| <b>ICGC cohort</b>    |               |          |
|-----------------------|---------------|----------|
| <b>(n = 229)</b>      |               |          |
| <b>Variable</b>       | <b>Number</b> | <b>%</b> |
| <b>Age</b>            |               |          |
| < = 55                | 25            | 10.9     |
| > 55                  | 204           | 89.1     |
| <b>Gender</b>         |               |          |
| Female                | 60            | 26.2     |
| Male                  | 169           | 73.8     |
| <b>Family history</b> |               |          |
| No                    | 141           | 65.9     |
| Yes                   | 73            | 34.1     |
| <b>TNM stage</b>      |               |          |
| I                     | 35            | 15.3     |
| II                    | 104           | 45.4     |
| III                   | 71            | 31.0     |
| IV                    | 19            | 8.3      |

**Table S4. The clinical characteristic information of the HCC patients in CHCC cohort**

| <b>CHCC cohort</b>     |               |          |
|------------------------|---------------|----------|
| <b>(n = 159)</b>       |               |          |
| <b>Variable</b>        | <b>Number</b> | <b>%</b> |
| <b>Age</b>             |               |          |
| <= 55                  | 88            | 55.3     |
| > 55                   | 71            | 44.7     |
| <b>Gender</b>          |               |          |
| Female                 | 31            | 19.5     |
| Male                   | 128           | 80.5     |
| <b>Tumor number</b>    |               |          |
| 1                      | 117           | 73.6     |
| >1                     | 42            | 26.4     |
| <b>Tumor size</b>      |               |          |
| <=5cm                  | 76            | 47.8     |
| > 5cm                  | 83            | 52.2     |
| <b>Liver cirrhosis</b> |               |          |
| No                     | 47            | 29.6     |
| Yes                    | 112           | 70.4     |
| <b>Tumor thrombus</b>  |               |          |
| No                     | 122           | 76.7     |
| Yes                    | 37            | 23.3     |
| <b>AFP</b>             |               |          |
| Low (<=300ng/ml)       | 98            | 61.6     |
| High (>300ng/ml)       | 61            | 38.4     |
| <b>BCLC stage</b>      |               |          |
| A                      | 68            | 42.8     |
| B                      | 52            | 32.7     |
| C                      | 39            | 24.5     |
| <b>TNM stage</b>       |               |          |
| I                      | 91            | 57.2     |
| II                     | 14            | 8.8      |
| III                    | 52            | 32.7     |
| IV                     | 2             | 1.3      |

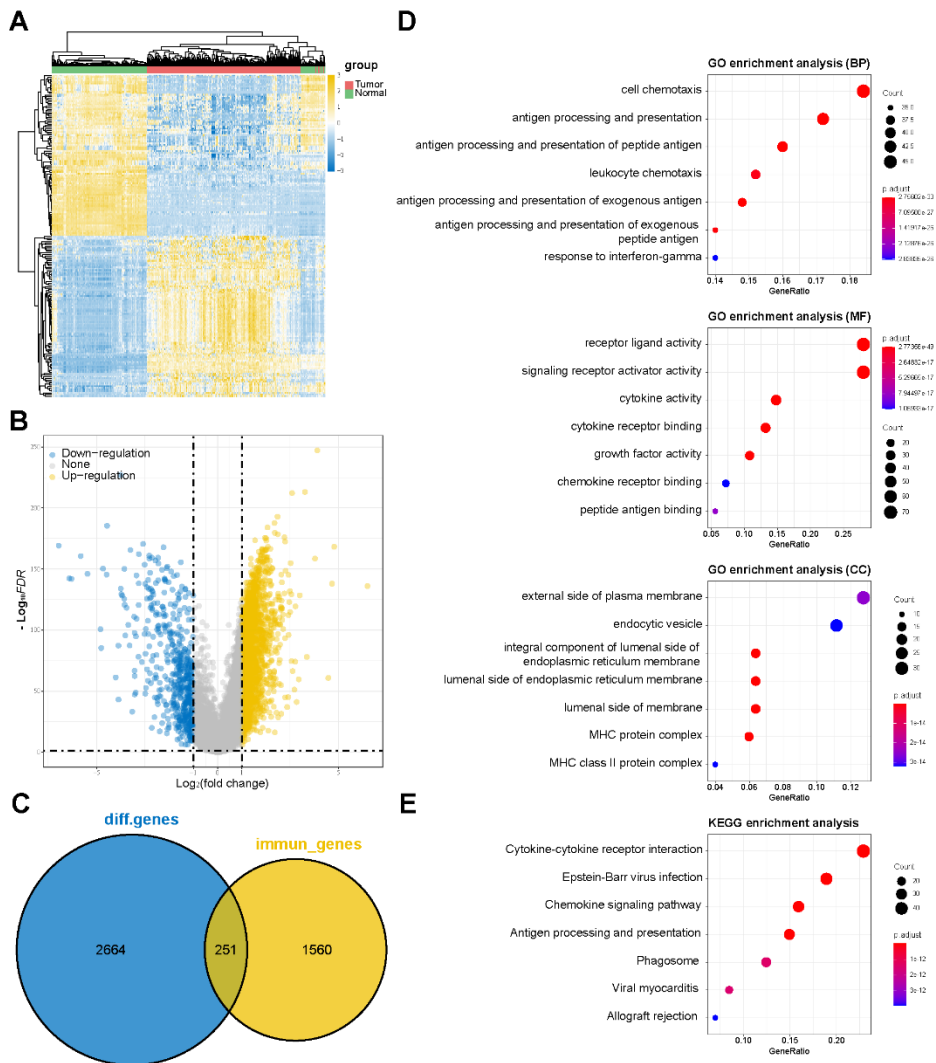

**Figure S1. Identify the immune-related DEGs between HCC and normal liver tissues**  
**A**, Volcano plot of DEGs between HCC and normal tissues in TCGA data portal. **B**, Heatmap of DEGs between HCC and normal tissues. **C**, Venn diagram visualizing the intersections of DEGs with immune-related genes from ImmPort database. **D and E**, Enrichment analysis of 251 immune-related DEGs.

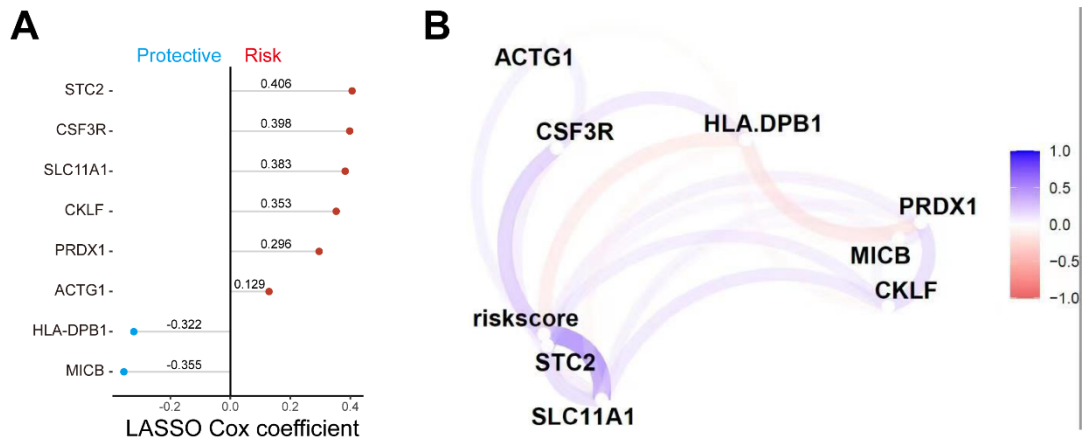

**Figure S2. The coefficients and the corresponding correlations.**

**A**, The lollipop map showing the coefficients of the IGS genes. **B**, The correlation network involving the 8 genes and risk score.

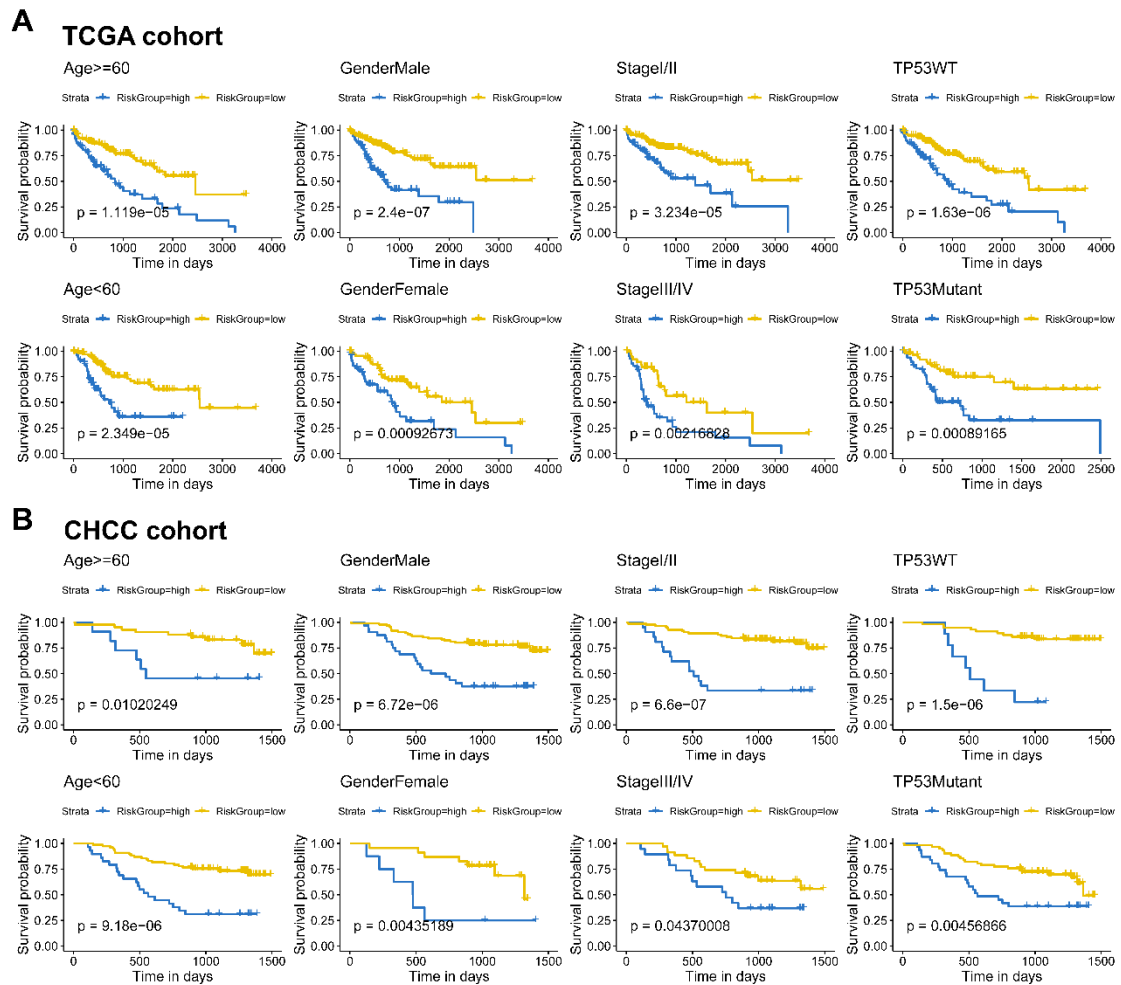

**Figure S3. Stratified survival analysis of the high- and low-risk groups in the TCGA cohort and CHCC cohort.**

The pooled TCGA or CHCC cohort was stratified into sub-groups based on the parameters including Age ( $\geq 60$  or  $< 60$ ), Gender, Stage (I/II or III/IV), and TP53 status (wide-type or mutated). **A**, Kaplan-Meier analysis with a log-rank test was conducted in the sub-groups of the TCGA cohort. **B**, Kaplan-Meier curves in the sub-groups of CHCC cohort.

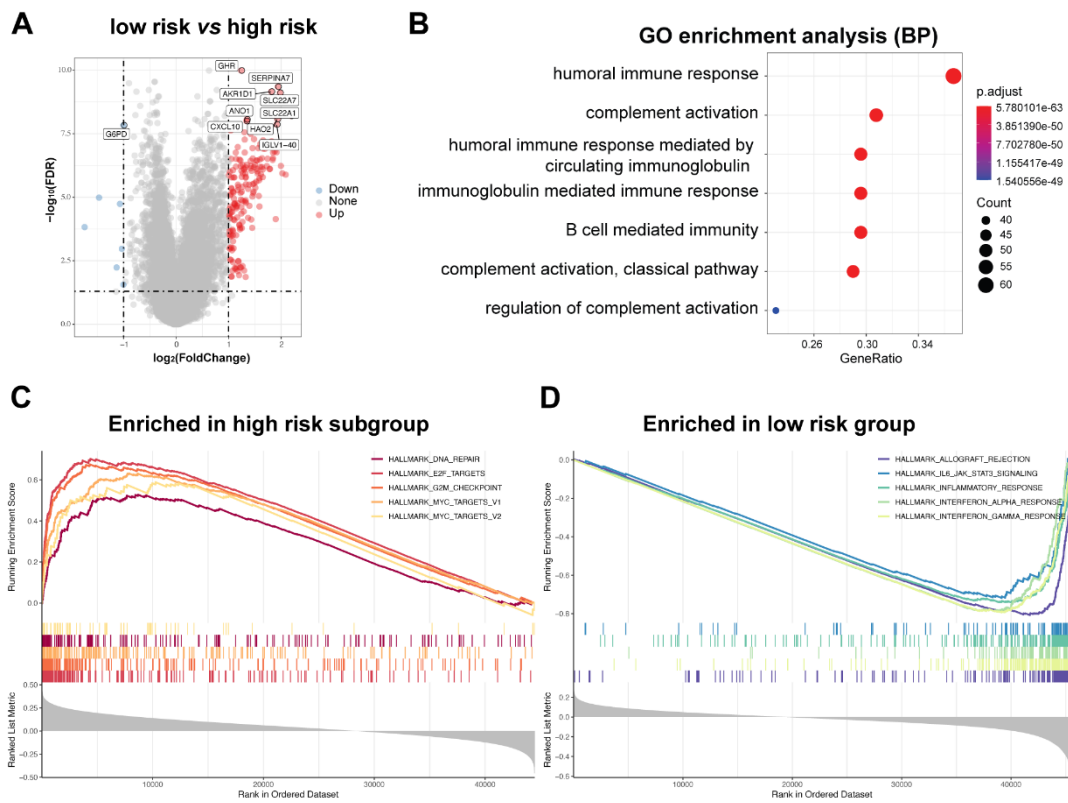

**Figure S4. Molecular characteristics of different IGS subgroups.** **A**, Volcano plot of the DEGs between IGS-low and -high groups in TCGA cohort. **B**, GO analysis of the DEGs above. **C**, GSEA analysis in high IGS risk subgroup ( $P < 0.05$ ,  $\text{FDR} < 0.25$ ). **D**, GSEA analysis in low IGS risk subgroup ( $P < 0.05$ ,  $\text{FDR} < 0.25$ ).



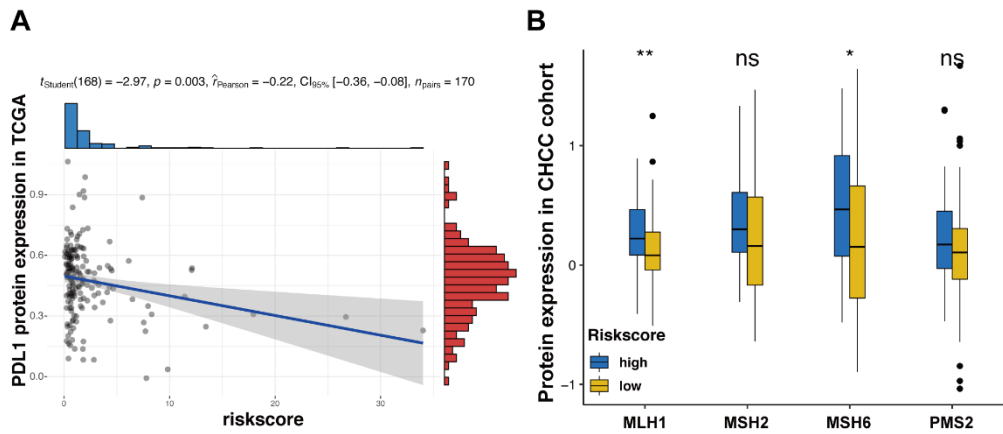

**Figure S5. The correlation of IGS risk score with PDL1 and MSI genes.**

**A**, the correlation of IGS risk score with PDL1 expression in LIHC TCGA cohort. **B**, the expression of MSI-related genes in IGS-high and IGS-low sub-group in CHCC cohort.
